# Supplementary material for: A rationally designed singlet sink for glassy polymeric photon upconverting films
Source: Royal Society of Chemistry journal article supplement (doi:10.1039/d3tc04619b), 2024-01-01
Supplement: d3tc04619b1.pdf [file d3tc04619b1.pdf]

SUPPLEMENTARY INFORMATION

Rationally Designed Singlet Sink for Glassy Polymeric Photon  
Upconverting Films

*Sonia T. Stanciu,<sup>a</sup> Steponas Raišys,<sup>b</sup> Karolis Kazlauskas,<sup>b</sup> Yoan C. Simon<sup>a,c\*</sup>*

a. School of Polymer Science and Engineering, The University of Southern Mississippi, 118 College Dr.  
#5050, Hattiesburg 39406, MS, USA

b. Institute of Photonics and Nanotechnology, Vilnius University, Saulėtekio Av. 3, LT-10257 Vilnius,  
Lithuania

c. School of Molecular Sciences and Biodesign Center for Sustainable Macromolecular Materials and  
Manufacturing, Arizona State University, Tempe, AZ, 85281, USA

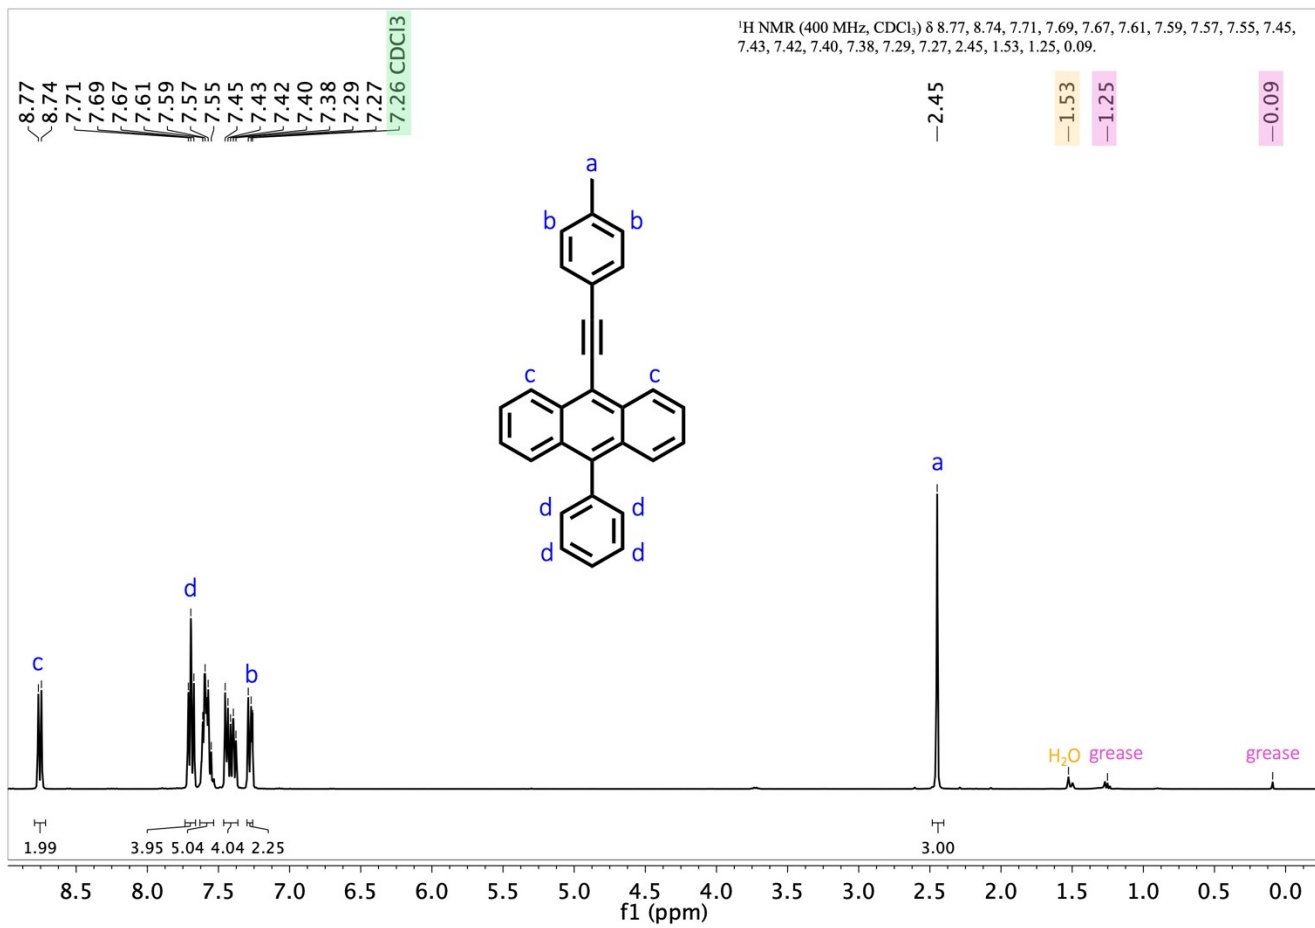

**Figure S1.** <sup>1</sup>H NMR spectroscopy of PTEA.

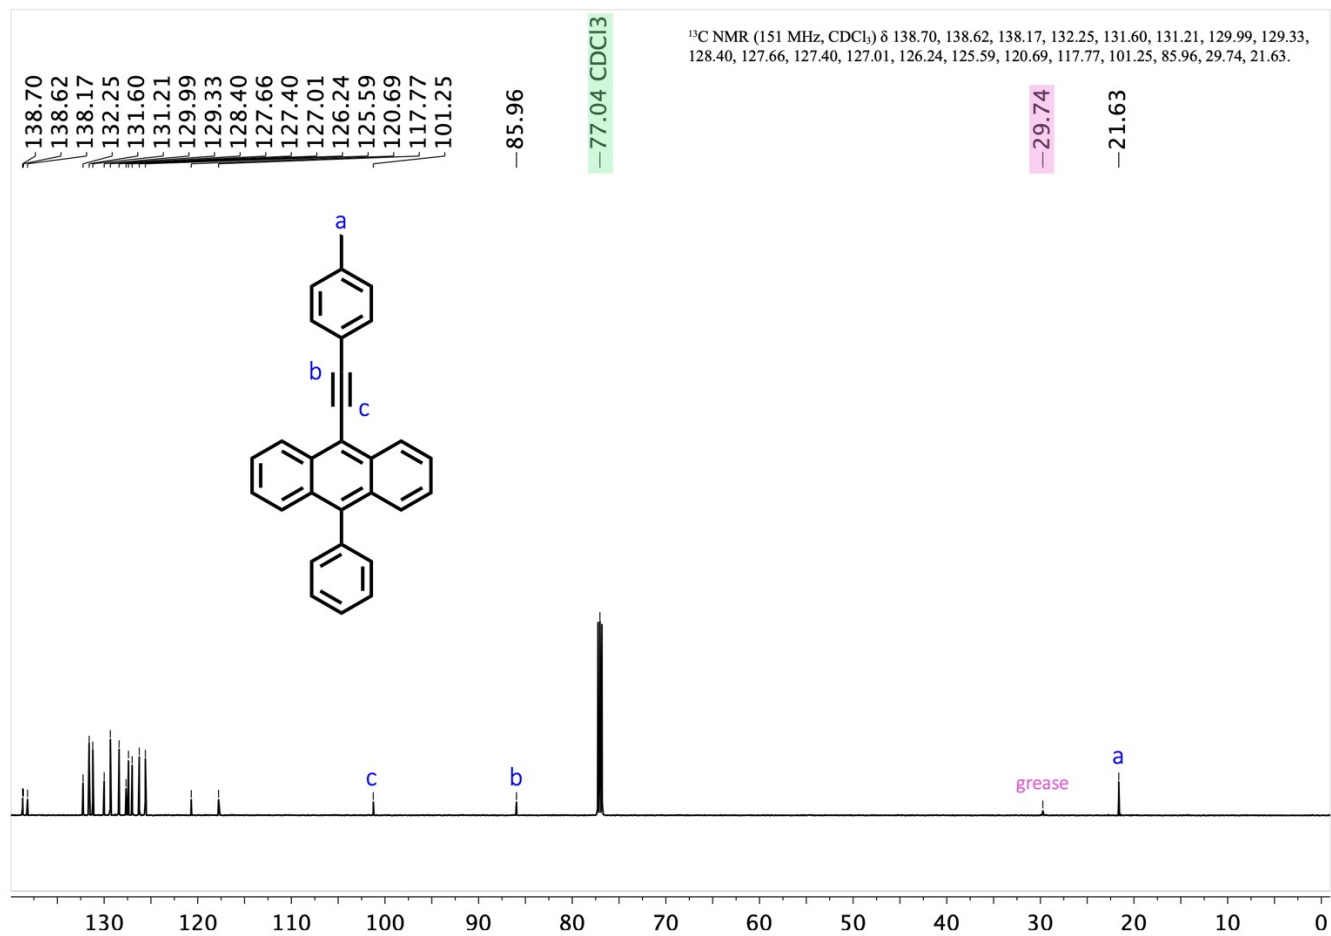

**Figure S2.** <sup>13</sup>C NMR spectroscopy of PTEA.

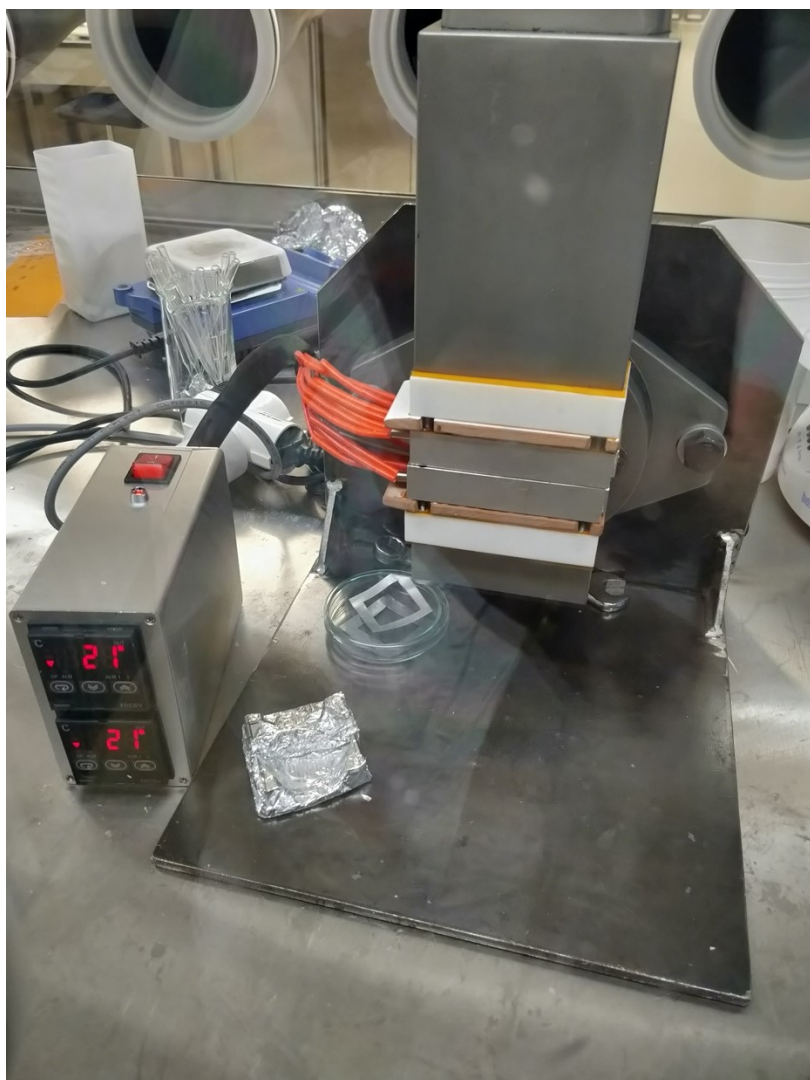

**Figure S3.** Custom-made mechanical hot-press used for sample preparation in N<sub>2</sub> glovebox. Surface area: 100 x 40 mm. Heating power: 240 W (top and bottom heating elements have capability of being controlled separately). Pressing force: ~100 kg/cm<sup>2</sup>. Heating temperature capability: from room temperature up to 300 °C.

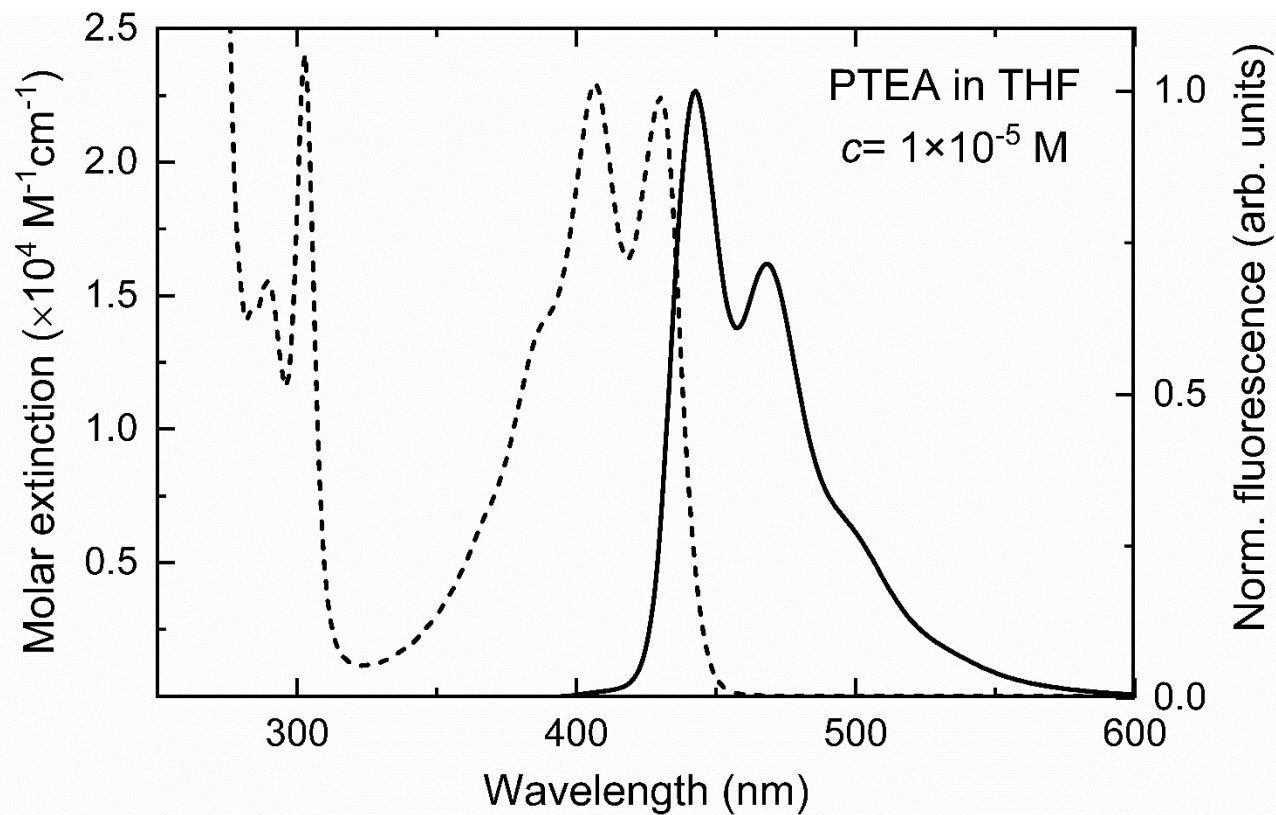

**Figure S4.** Molar extinction and normalized fluorescence spectra of PTEA ( $1 \times 10^{-5} \text{ M}$ ) in THF. Excitation wavelength for fluorescence: 375 nm. Maximum molar extinction coefficient (MEC) at 407 nm =  $2.30 \times 10^4 \text{ M}^{-1} \text{ cm}^{-1}$ . MEC at 430 nm =  $2.24 \times 10^4 \text{ M}^{-1} \text{ cm}^{-1}$

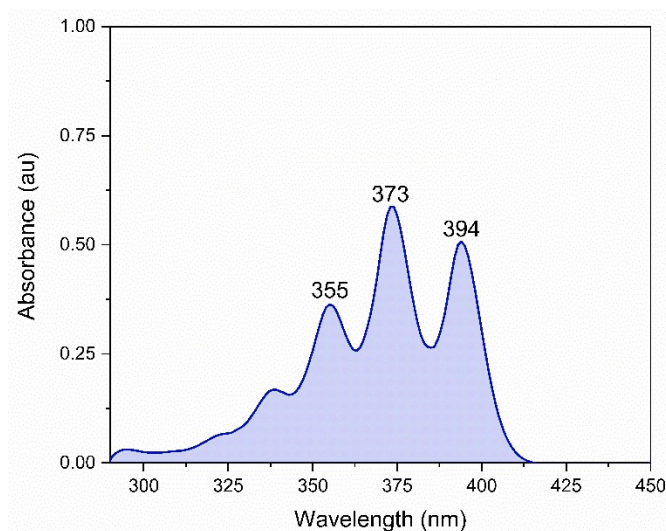

**Figure S5.** Absorbance profile of DPA in THF ( $c = 4 \cdot 10^{-5}$  M) by UV-Vis spectroscopy.

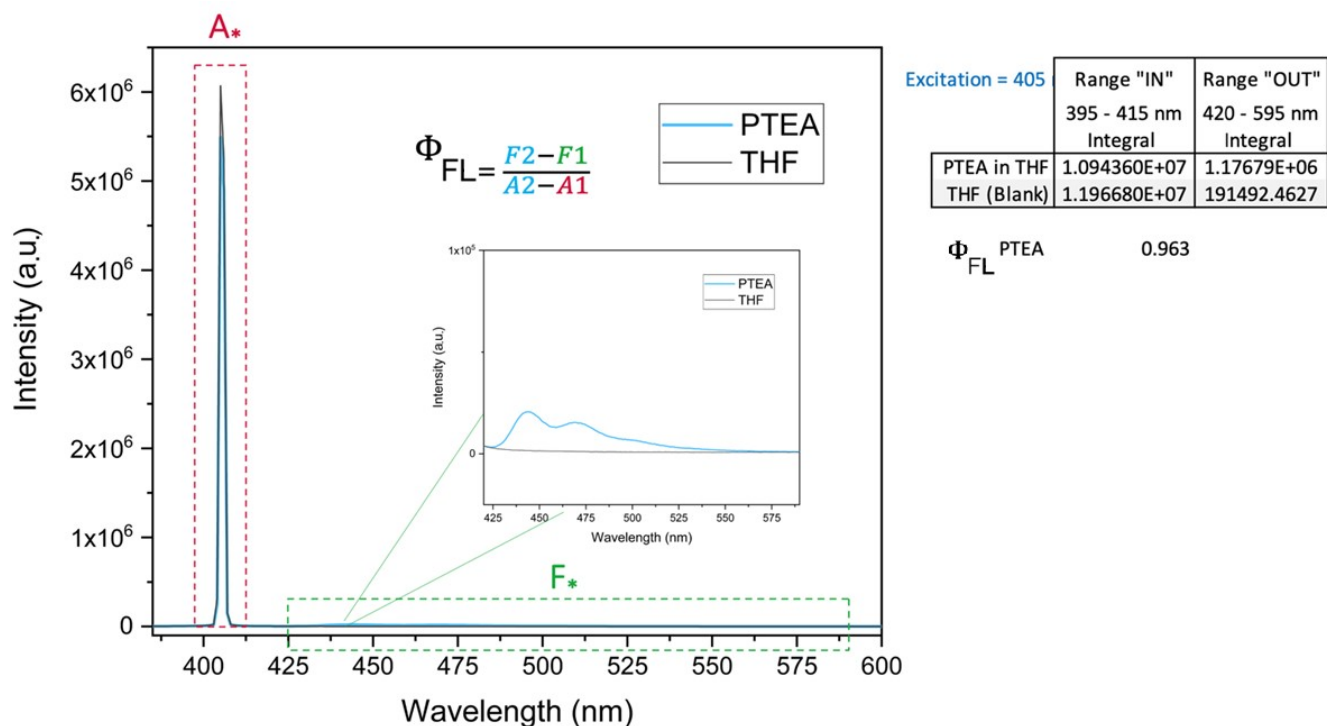

**Figure S6.** Absolute fluorescence quantum yield ( $\Phi_{FL}$ ) of PTEA in THF. The  $\Phi_{FL}$  of PTEA was measured at a concentration of  $10^{-5}$  M by integrating sphere technique with a Horiba Scientific K-Sphere by exciting at 405 nm using a  $90^\circ$  angle geometry.  $F_2$  = integral of PTEA photoluminescence from 420 nm – 595 nm.  $F_1$  = integral of THF photoluminescence from 420 nm – 595 nm.  $A_2$  = integral of PTEA excitation from 395 – 415 nm.  $A_1$  = integral of THF excitation from 395 nm – 415 nm.

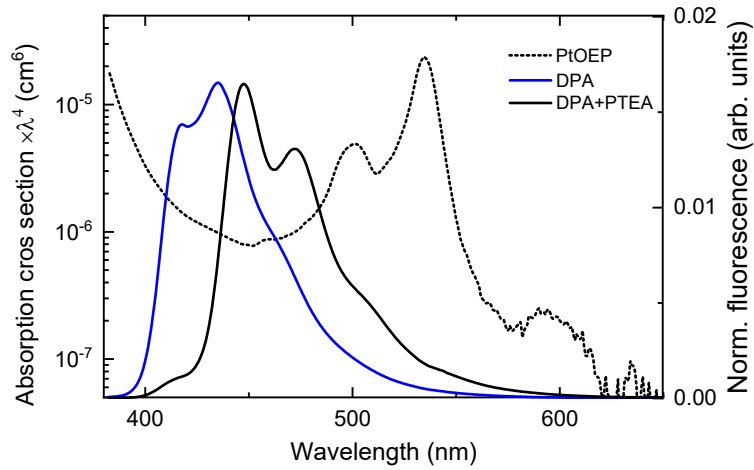

**Figure S7.** Absorption cross section of PtOEP (multiplied by  $\lambda^4$ ) in PMMA at 0.05 wt% and fluorescence spectra of UC films of DPA(40wt%)/PtOEP(0.05wt%)/PMMA and PTEA(0.25wt%)/DPA(40wt%)/PtOEP(0.05wt%)/PMMA. Excitation for fluorescence – 375 nm. Fluorescence spectra are normalized to integrated spectral area.

Our calculations of the overlap integral ( $J$ ) for PTEA $\rightarrow$ PtOEP and DPA $\rightarrow$ PtOEP in UC films containing 0.05 wt% PtOEP, 40 wt% DPA and varying concentration (0-0.5 wt%) of PTEA confirm that  $J$  is larger for PTEA ( $J_{\text{PTEA}}=[1.8\text{-}2.1]\times 10^8 \text{ nm}^6$ ) compared to DPA ( $J_{\text{DPA}}=1.5\times 10^8 \text{ nm}^6$ ). Calculation results are provided in Table R1 below.

**Table S1.** Förster energy transfer rate calculation of UC films with 40wt% DPA, 0.05 wt% PtOEP and 0-0.5 wt% PTEA.

| No. |                          | PTEA<br>conc.<br>wt% | $J^{(1)}$<br>nm <sup>6</sup> | $\Phi_{\text{FL}}^{(2)}$<br>% | $R_0^{(3)}$<br>nm | $d^{(4)}$<br>nm | $\tau^{(5)}$<br>ns | $k_{\text{F}}^{(6)}$<br>s <sup>-1</sup> |
|-----|--------------------------|----------------------|------------------------------|-------------------------------|-------------------|-----------------|--------------------|-----------------------------------------|
| 1   | DPA $\rightarrow$ PtOEP  | 0                    | $1.5\cdot 10^8$              | 18                            | 2.77              | 1.05            | 3.8                | $8.8\cdot 10^9$                         |
| 2   |                          | 0.025                | $1.8\cdot 10^8$              | 27                            | 3.05              | 11.4            | 4.6                | $8.0\cdot 10^3$                         |
| 3   | PTEA $\rightarrow$ PtOEP | 0.05                 | $1.9\cdot 10^8$              | 35                            | 3.21              | 10.1            | 4.8                | $2.1\cdot 10^4$                         |
| 4   |                          | 0.1                  | $2.0\cdot 10^8$              | 35                            | 3.25              | 8.84            | 4.8                | $5.1\cdot 10^4$                         |
| 5   |                          | 0.25                 | $2.0\cdot 10^8$              | 44                            | 3.38              | 7.46            | 5.4                | $1.6\cdot 10^5$                         |
| 6   |                          | 0.5                  | $2.1\cdot 10^8$              | 43                            | 3.39              | 6.13            | 5.2                | $5.4\cdot 10^5$                         |

1) Spectral overlap integral. 2) Fluorescence quantum yield. 3) Förster radius. 4) distance between

emitter/annihilator and PtOEP,  $d = \sqrt[3]{\frac{1}{(c_{donor} + c_{acceptor}) \cdot N_A}}$ , where  $c = \frac{wt \cdot \rho}{M}$  (M – molar mass,  $\rho$  – density,  $\rho=1.18 \text{ g/cm}^3$  was used in calculations). 5) singlet state lifetime. 6) Förster rate.

Spectral overlap integral  $J(\lambda)$  calculated by:  $J(\lambda) = \int \lambda^4 F_D(\lambda) \sigma_A(\lambda) d\lambda$ ,

where  $\lambda$  is the wavelength,  $F_D$  is the normalized fluorescence spectrum, and  $\sigma_A$  is absorption cross-section.

Förster radius calculated by:

$$R_0 = \sqrt[6]{\frac{9\Phi_{FL}\kappa^2}{128\pi^5 n^4} J(\lambda)},$$

where  $\Phi_{FL}$  is the fluorescence quantum yield,  $\kappa$  is dipole orientation factor ( $\kappa$  was assumed to be  $0.845\sqrt{2/3}$  for amorphous film with randomly oriented dipoles. [M. Z. Maksimov, I. M. Rozman, Opt. Spectrosc. 1962, 12, 337.]),  $n$  is the refraction index.

Förster rate:

$$k_F = \frac{1}{\tau} \left( \frac{R_0}{d} \right)^6.$$

Despite shifting the emission spectrum away from the PtOEP Soret band, introducing PTEA also increases the overlap with its Q band, leading to a slightly larger  $J$ .



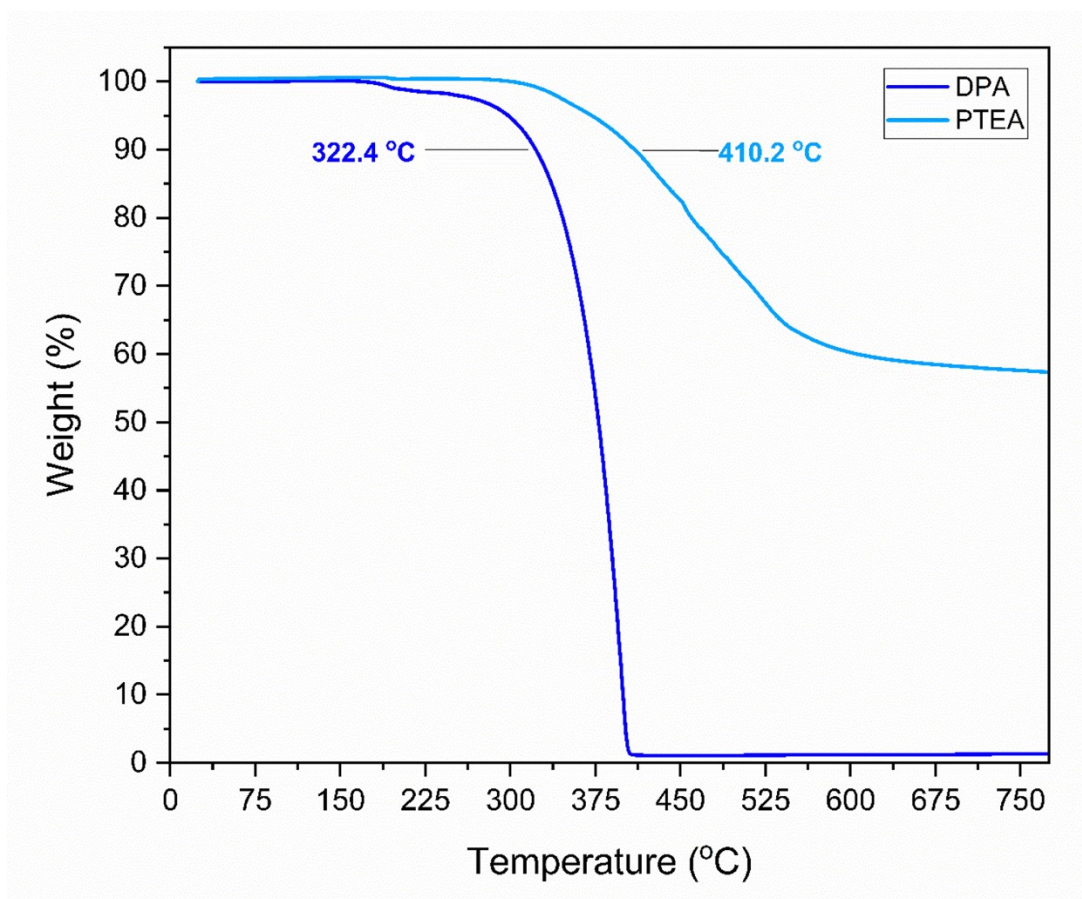

**Figure S8.** Thermogravimetric analysis (TGA) of DPA and PTEA to compare degradation temperature (10% mass loss). DPA 10% mass loss at 322 °C, PTEA 10% mass loss at 410 °C.

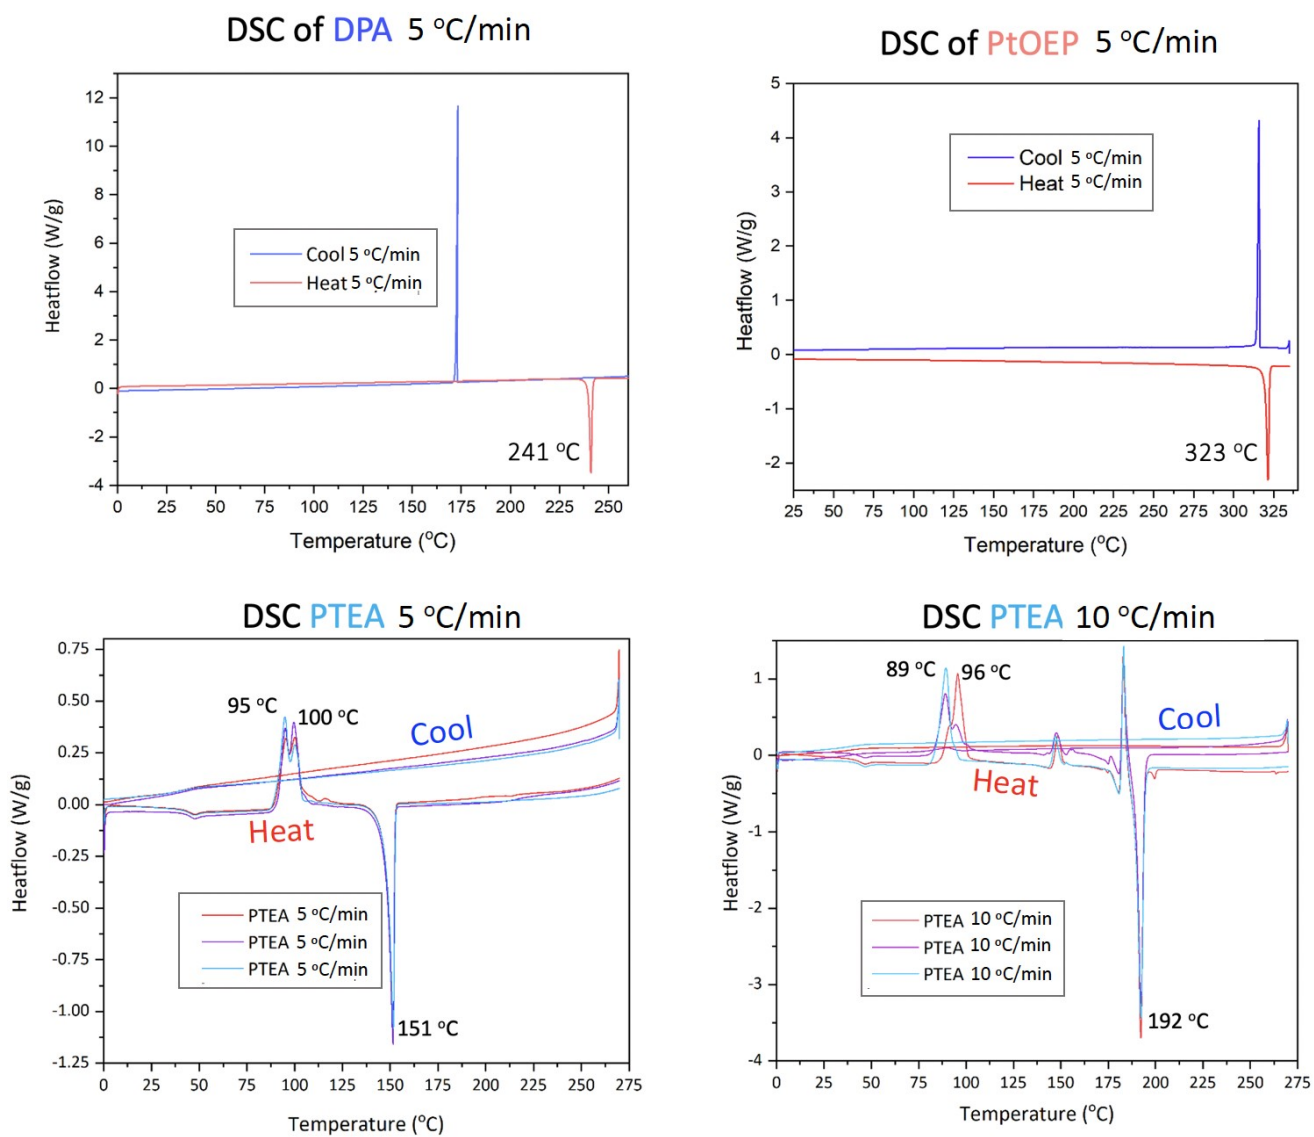

**Figure S9.** Differential scanning calorimetry (DSC) of DPA, PtOEP, and PTEA at various ramp rates detailed in graph title (°C/minute). First cool and second heat at identical ramp rates for all respective scans. First heat has been removed. All DSC curves are “exo up.”

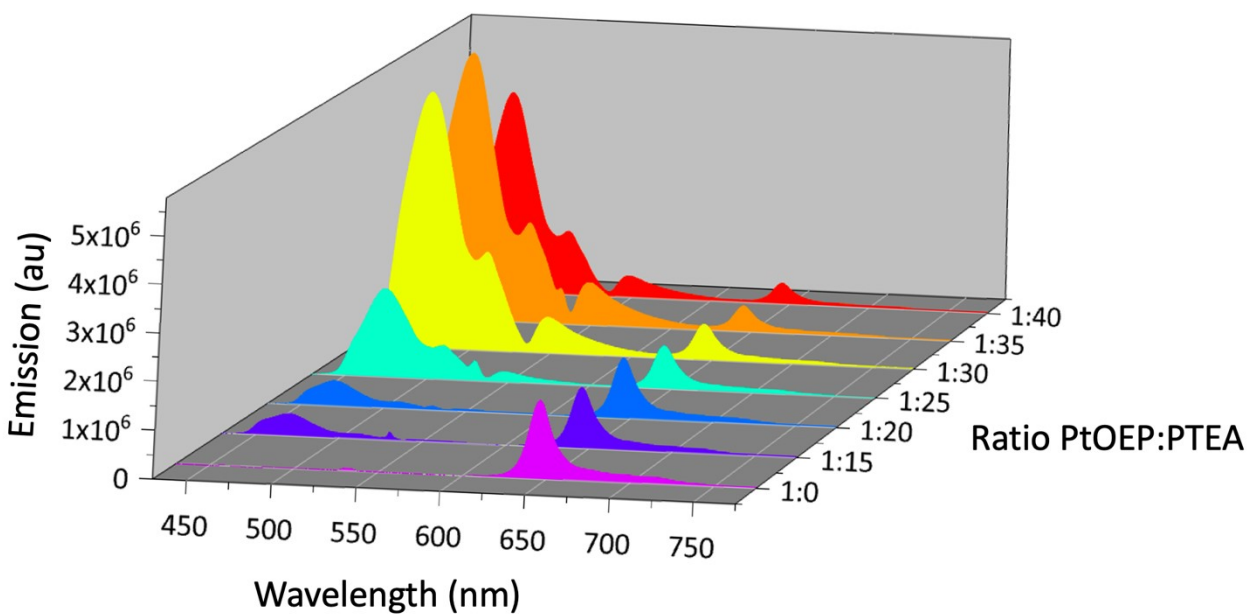

**Figure S10.** Emission spectrum as a function of ratio of PtOEP (excited species) and PTEA (quencher species) in THF. Excitation at 532 nm. PtOEP maximum emission at 645 nm. PTEA maximum emission 470 nm.  $x$  axis = wavelength,  $y$  axis = emission intensity (a.u.),  $z$  axis = ratio of PtOEP:PTEA. (0.1 mg PtOEP: “ $x$ ” mg PTEA in 3.5 mL THF).

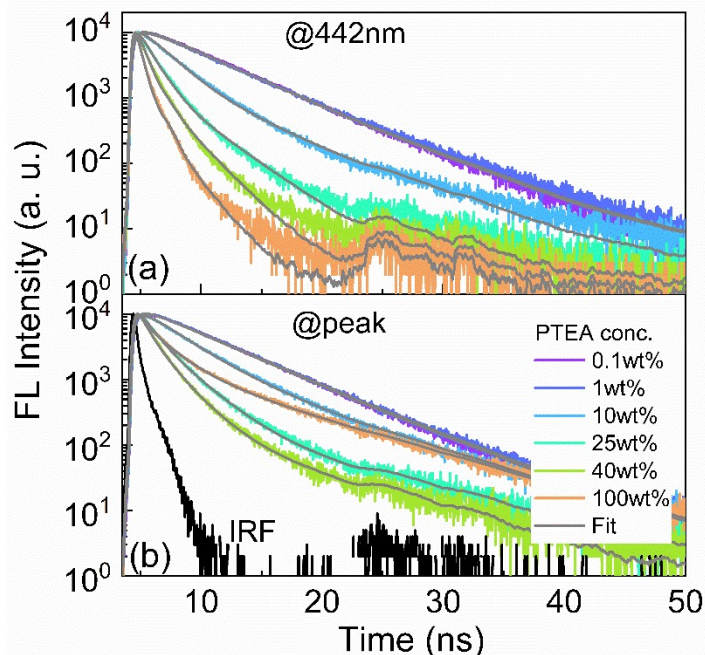

**Figure S11.** Fluorescence transients as a function of increasing PTEA concentration in PMMA matrix (drop-cast films) Excitation wavelength: 375 nm. (a) Measured at 442 nm and (b) measured at FL peak maximum. See **Table S2** for fitting parameters.

**Table S2:** Fitting parameters of FL transients of drop-cast PTEA/PMMA films.

| PTEA conc.<br>in PMMA       | $\tau_1$<br>ns | $f_1$ | $\tau_2$<br>ns | $f_2$ | $\tau_3$<br>ns | $f_3$ | $\langle\tau\rangle$<br>ns |
|-----------------------------|----------------|-------|----------------|-------|----------------|-------|----------------------------|
| Measured at 442 nm          |                |       |                |       |                |       |                            |
| 0.1wt%                      | --             | --    | --             | --    | 5.28           | 100   | 5.28*                      |
| 1wt%                        | --             | --    | --             | --    | 5.41           | 100   | 5.41*                      |
| 10wt%                       | --             | --    | 1.95           | 62    | 5.57           | 38    | 3.33                       |
| 25wt%                       | --             | --    | 0.86           | 67    | 3.32           | 33    | 1.67                       |
| 40wt%                       | --             | --    | 0.51           | 72    | 2.3            | 28    | 1.01                       |
| 100wt%                      | --             | --    | 0.29           | 87    | 1.88           | 13    | 0.50                       |
| Measured at FL peak maximum |                |       |                |       |                |       |                            |
| 0.1wt%                      | --             | --    | --             | --    | 5.41           | 100   | 5.41*                      |
| 1wt%                        | --             | --    | --             | --    | 5.52           | 100   | 5.52*                      |
| 10wt%                       | --             | --    | 2.91           | 63    | 7.14           | 37    | 4.48                       |
| 25wt%                       | 0.76           | 33    | 2.48           | 57    | 8.56           | 10    | 2.52                       |
| 40wt%                       | 0.58           | 41    | 1.96           | 49    | 7.07           | 10    | 1.91                       |
| 100wt%                      | 0.49           | 20    | 2.15           | 39    | 7.80           | 41    | 4.13                       |

$f_i$  – fractional intensity,  $\tau_i$  – FL lifetime,  $\langle\tau\rangle$  – singlet exciton lifetime calculated as  $\langle\tau\rangle = \sum f_i \cdot \tau_i$ . \* - monoexponential FL decay constant ( $\langle\tau\rangle = \tau$ ).

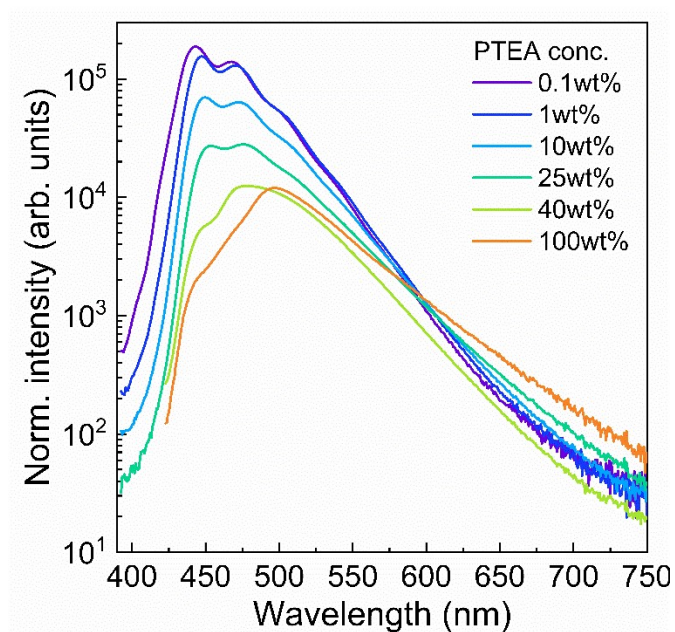

**Figure S12.** Absorbance corrected FL spectra of PTEA doped PMMA films. Excitation at 375 nm.

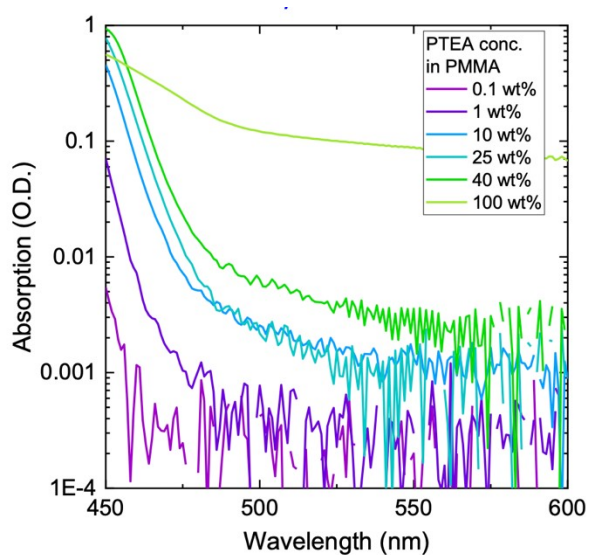

**Figure S13.** Absorption spectra of DPA-free PMMA films doped with increasing concentration of PTEA (indicated).

Optical Microscopy Data

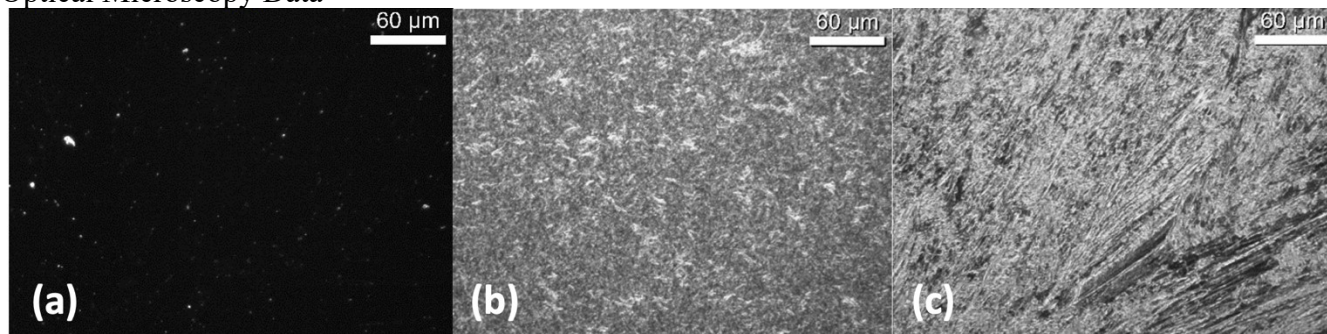

**Figure S14.** Microscope images of (a) 25 wt% PTEA and (b) 40 wt% PTEA doped into PMMA. (c) Neat PMMA. Images obtained with an Olympus BX-51 microscope working in dark field mode.

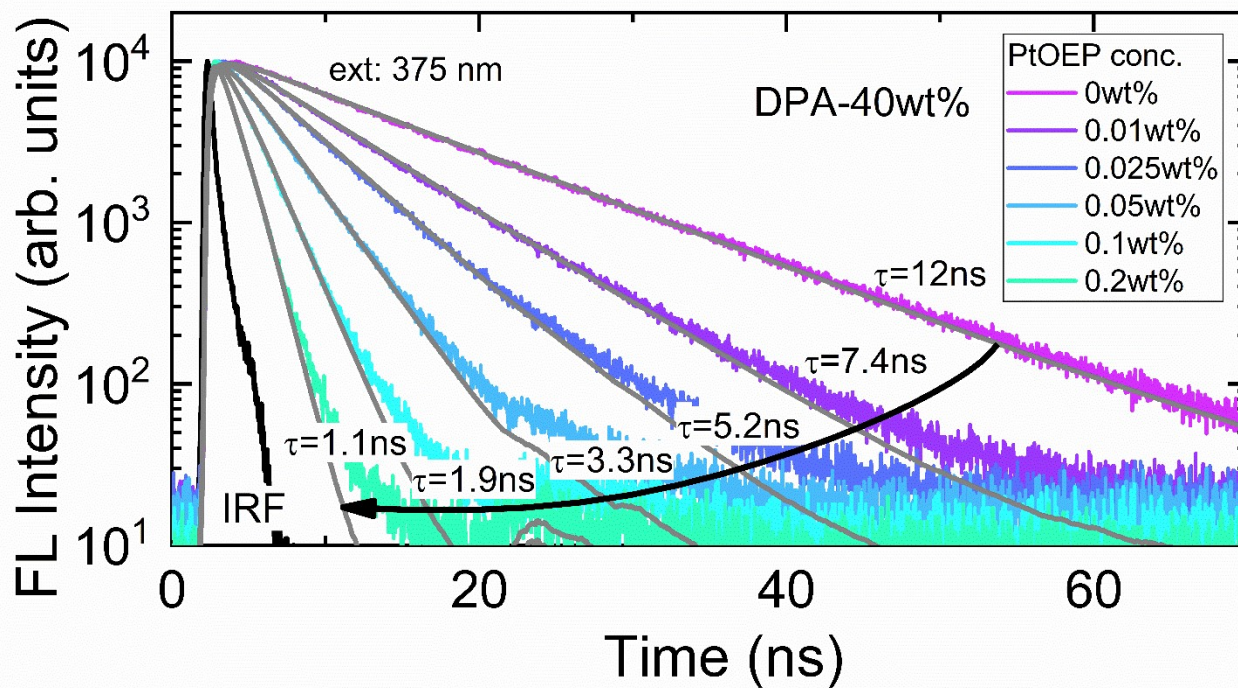

**Figure S15.** FL transients of sink-free UC films (40 wt% DPA) with varying PtOEP concentration (indicated). Excitation wavelength: 375 nm. Transients recorded at 436 nm. IRF – instrument response function.

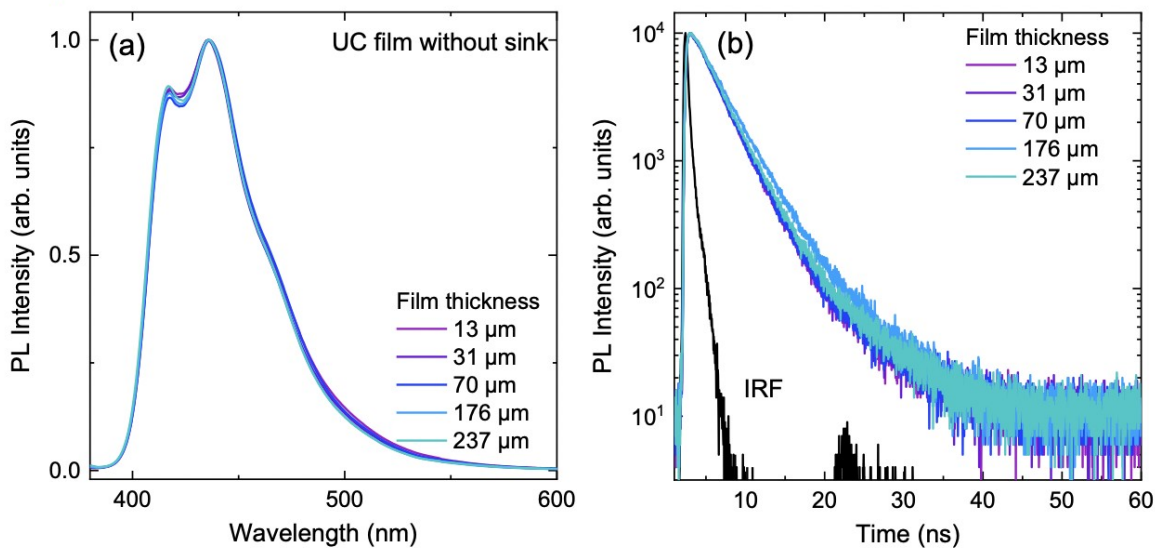

**Figure S16.** (a) Normalized FL spectra and (b) transients of sink-free UC films (40 wt% DPA, 0.05 wt% PtOEP) with varying thicknesses (indicated). Excitation wavelength: 375 nm. Transients recorded at 436 nm. IRF – instrument response function.

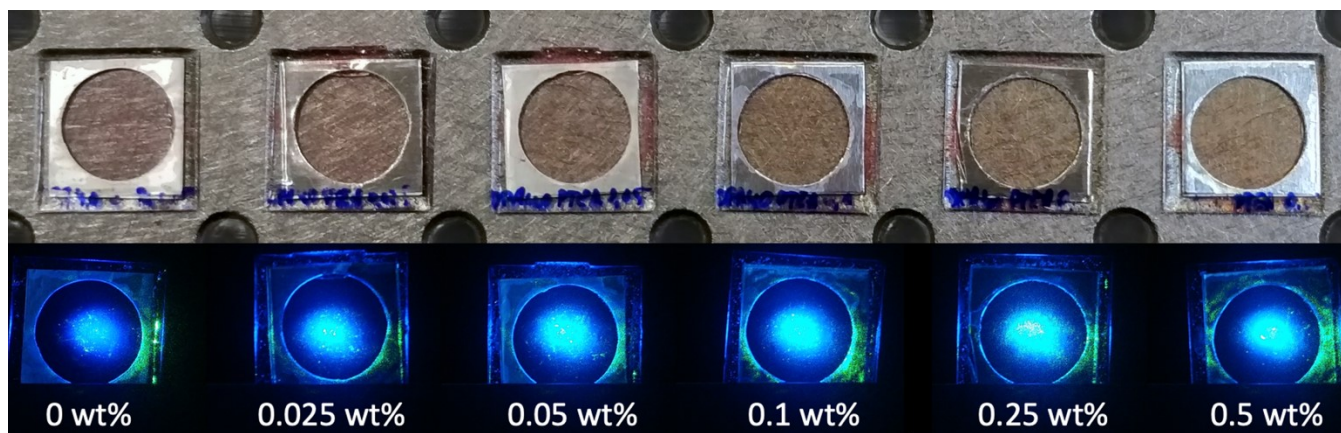

**Figure S17.** Photos of six melt-processed PMMA films (PtOEP = 0.05 wt%, DPA = 40 wt%) with increasing PTEA content (indicated). Photos were taken under identical camera settings and excitation exposure at 532 nm.



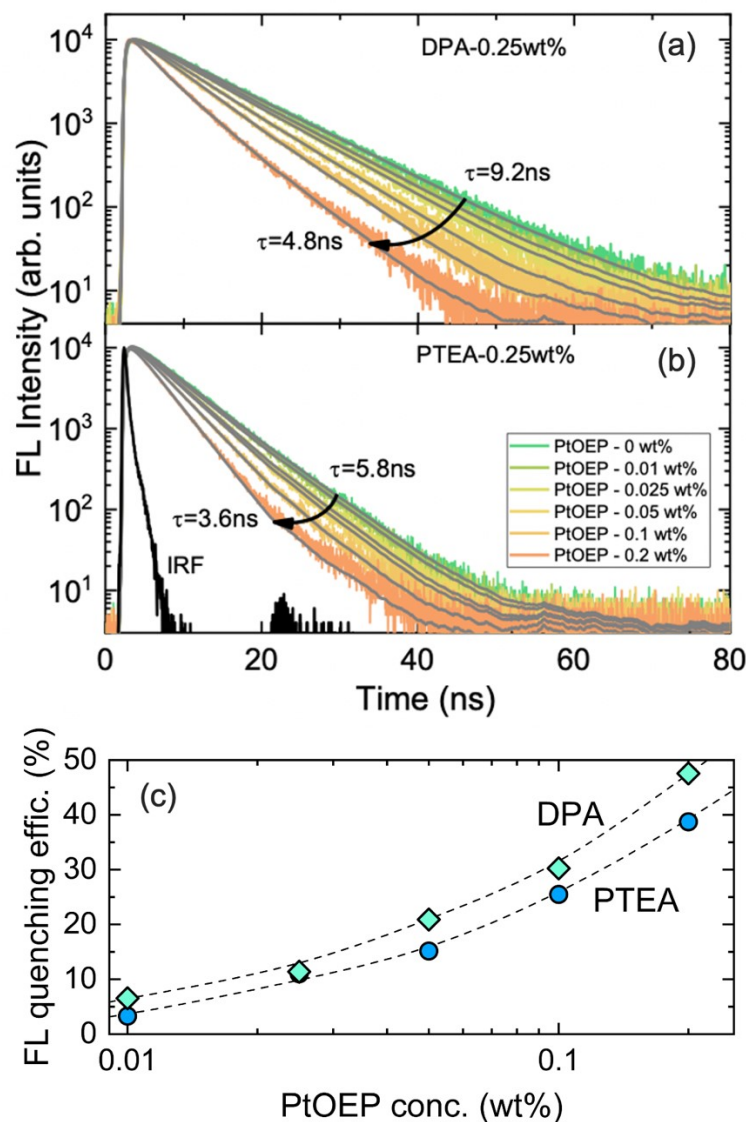

**Figure S18.** FL transients of 0.25 wt% DPA (a) and 0.25 wt% PTEA (b) in PMMA films as a function of increasing PtOEP concentration. Excitation wavelength = 375 nm. Transients measured at emission maxima (407 nm for DPA and 446 nm for PTEA). IRF – instrument response function. Grey lines are mono-exponential fits. (c) FL quenching efficiency, calculated according to

$$\text{Quenching efficiency} = 1 - \frac{\tau_{w/PtOEP}}{\tau_{w/o PtOEP}}$$

where  $\tau_{w/PtOEP}$  is FL lifetime with PtOEP and  $\tau_{w/o PtOEP}$  is fluorescence lifetime without PtOEP. Despite similar quenching trends observed for both DPA- and PTEA-containing film sets upon increasing PtOEP concentration, DPA exhibited somewhat stronger overall quenching by PtOEP compared to PTEA (Figure S18c). Stern-Volmer quenching analysis yielded Stern-Volmer constants ( $K_{SV}$ ) of  $2.8 \cdot 10^2 \text{ M}^{-1}$  and  $2.0 \cdot 10^2 \text{ M}^{-1}$  for 0.25 wt% DPA and 0.25 wt% PTEA, respectively.

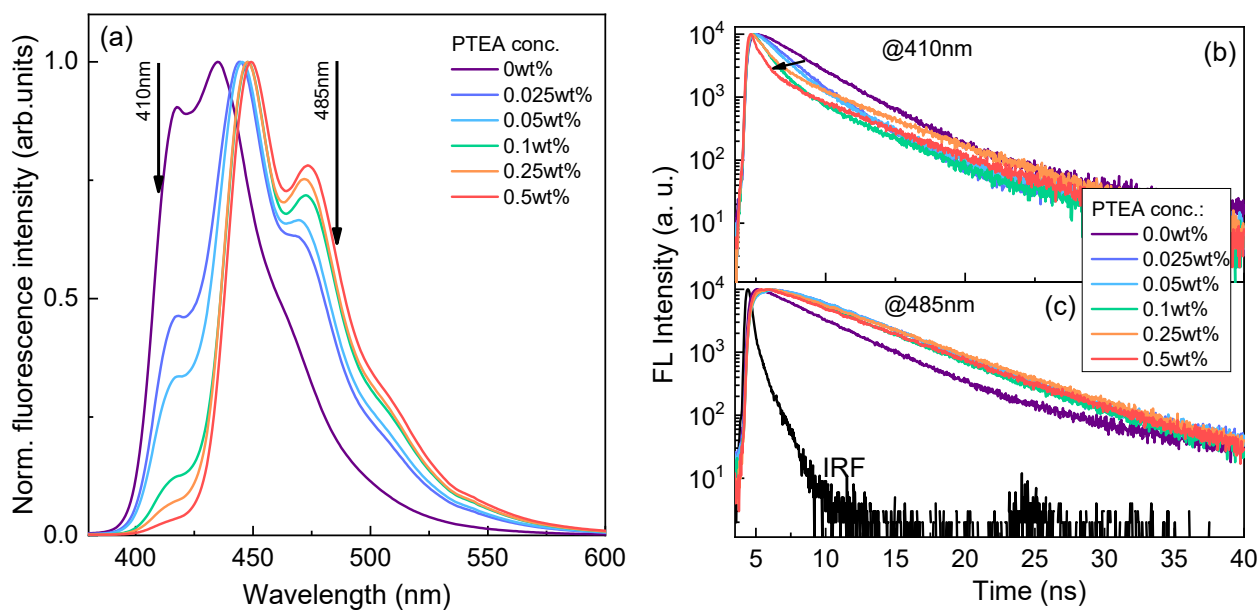

**Figure S19.** FL spectra (a) and transients of UC films measured at 410 nm (b) and 485 nm (c) as a function of singlet sink PTEA concentration. Excitation wavelength – 375 nm. IRF – instrument response function. See **Table S2** for fitting parameters and calculated energy transfer efficiency versus PTEA concentration in UC films.

**Table S3.** Fitting parameters of Fl transients of UC films and energy transfer efficiency. See **Figure S9** and **Figure 7** for plots.

| PTEA<br>conc. in<br>UC film | 410 nm         |       |                |       |                  | 485 nm       |
|-----------------------------|----------------|-------|----------------|-------|------------------|--------------|
|                             | $\tau_1$<br>ns | $f_1$ | $\tau_2$<br>ns | $f_2$ | $\phi_{ET}$<br>% | $\tau$<br>ns |
| 0.0wt%                      | 3.22           | 100   | --             | --    | 0                | 3.83         |
| 0.025wt%                    | 1.96           | 81    | 5.44           | 19    | 39               | 4.64         |
| 0.05wt%                     | 1.52           | 66    | 4.84           | 34    | 53               | 4.79         |
| 0.1wt%                      | 0.82           | 57    | 4.42           | 43    | 75               | 4.80         |
| 0.25wt%                     | 0.68           | 37    | 4.89           | 63    | 79               | 5.37         |
| 0.5wt%                      | 0.37           | 40    | 4.76           | 60    | 89               | 5.24         |

$\phi_{ET}$  - energy transfer efficiency from DPA to PTEA calculated from the accelerated decay component of DPA.

$$\phi_{ET} = 1 - \tau_{(DPA+PTEA)} / \tau_{DPA}$$

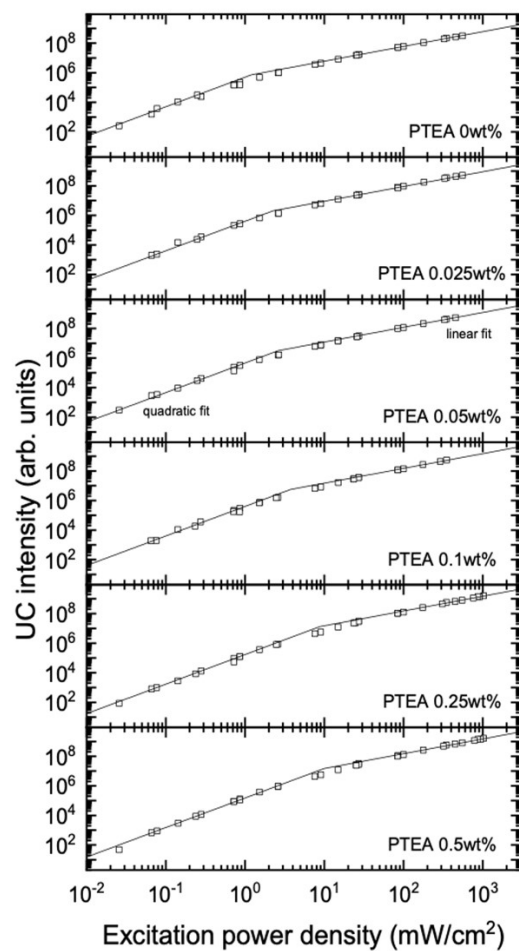

**Figure S20.** UC intensity dependence on excitation power density. See **Figure 8** for determined UC threshold at increasing PTEA concentrations in PMMA films.

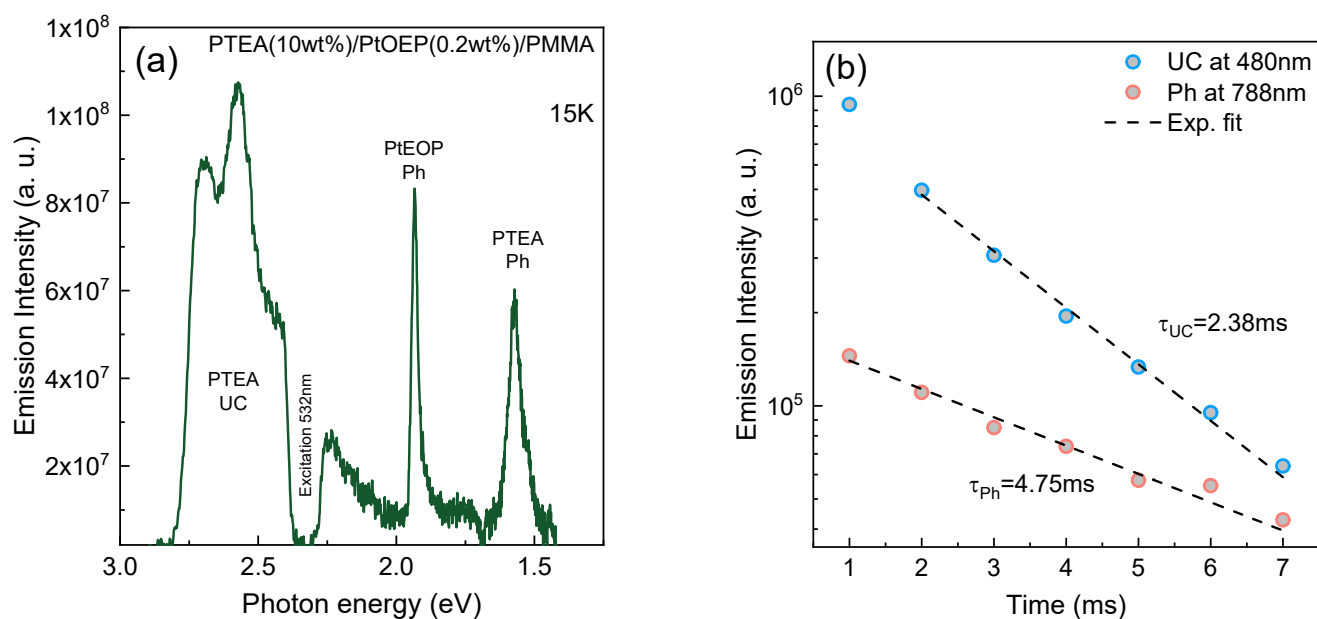

**Figure S21.** (a) The emission spectrum of PTEA (10 wt%)/PtOEP (0.2 wt%)/PMMA films, allowing for determination of the triplet energy level of PTEA, studying PAH phosphorescence at low temperatures (15 K). (b) The emission decay measured at 480 nm (within PTEA  $S_1$  level) and 788 nm (within PTEA  $T_1$  level).  $T_1$  of PTEA (first vibronic peak) = 1.57 eV ( $T_1$  of DPA = 1.72 eV),  $S_1$  of PTEA = 2.70 eV. Emission transients of UC and Ph bands of PTEA with corresponding lifetimes indicated. The relation  $\tau_{Ph} = 2 \times \tau_{UC}$  confirms that the emission band at 788 nm originates from the  $T_1$  of PTEA.
